# Supplementary material for: Analytical and Theoretical Studies of Antioxidant Properties of Chosen Anthocyanins; A Structure-Dependent Relationships
Source: MDPI journal article supplement (doi:10.3390/ijms23105432), 2022-05-12
Supplement: s1 [file s1]

## SUPPLEMENTARY MATERIALS

**Figure S1.** Distribution diagrams with deprotonation routes of the (a) delphinidin; (b) delphinidin 3-*O*-glucoside; (c) peonidin; (d) peonidin 3-*O*-glucoside; (e) petunidin; (f) petunidin 3-*O*-glucoside.

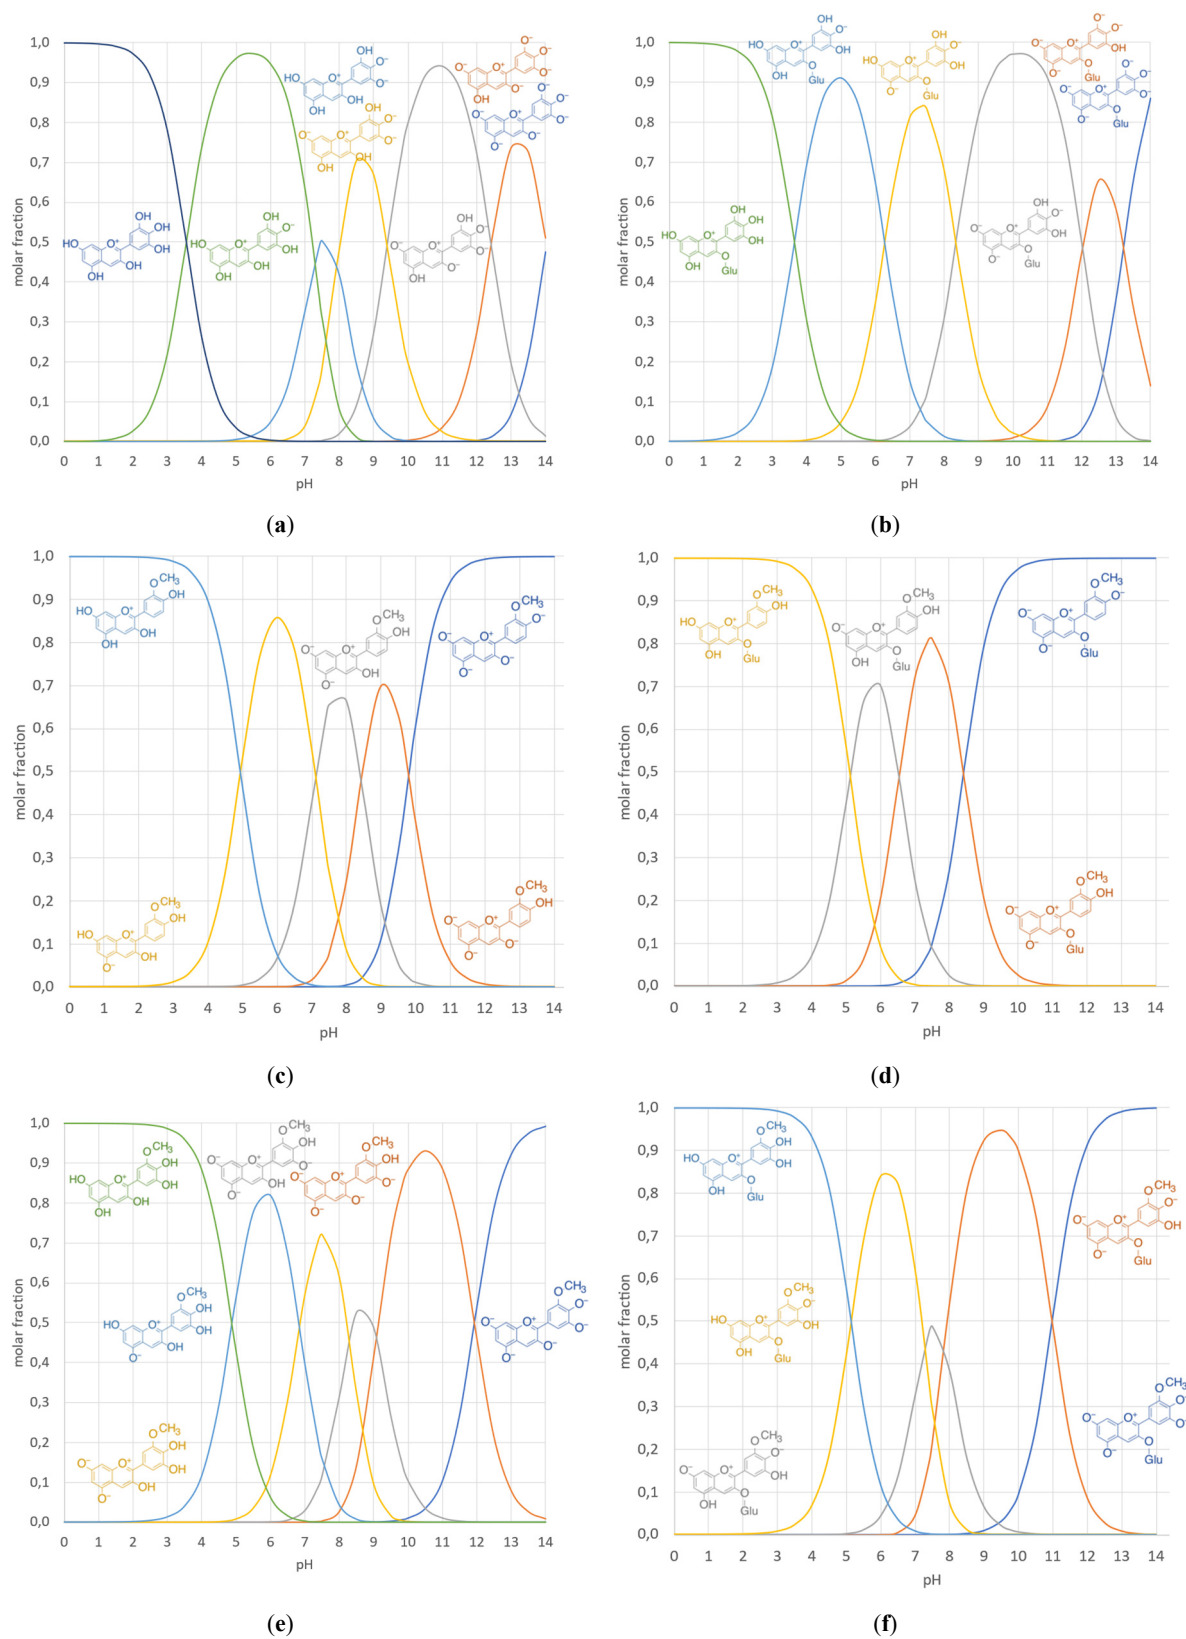

**Table S1.** Proton affinities (kcal mol<sup>-1</sup>) of anthocyanidins and anthocyanins investigated along with the reaction site. The lowest values are underlined.

|          |     | 1+          | 0           | 1–          | 2–          | 3–          | 4–          |
|----------|-----|-------------|-------------|-------------|-------------|-------------|-------------|
| Dp       | C3  | 25.8        | <b>29.1</b> |             |             |             |             |
|          | C3' | 26.4        | 37.2        | 39.8        | 45.4        | <b>45.2</b> |             |
|          | C4' | <b>17.3</b> |             |             |             |             |             |
|          | C5  | 22.6        | 39.1        | 32.4        | <b>35.7</b> |             |             |
|          | C5' | 32.1        | 29.7        | 41.4        | 46.4        | 45.6        | <b>50.3</b> |
|          | C7  | 22.4        | 29.3        | <b>31.2</b> |             |             |             |
| Dp 3-glc | C3  | <i>-Glu</i> | <i>-Glu</i> | <i>-Glu</i> | <i>-Glu</i> | <i>-Glu</i> | <i>-Glu</i> |
|          | C3' | 33.5        | 37.3        | 40.1        | <b>44.0</b> |             |             |
|          | C4' | <b>17.6</b> |             |             |             |             |             |
|          | C5  | 21.4        | <b>25.9</b> |             |             |             |             |
|          | C5' | 29.2        | 38.0        | 41.4        | 44.6        | <b>47.7</b> |             |
|          | C7  | 25.8        | 29.0        | <b>32.4</b> |             |             |             |
| Pn       | C3  | 23.7        | 29.0        | <b>32.7</b> |             |             |             |
|          | C4' | 26.4        | 30.7        | 33.8        | <b>37.0</b> |             |             |
|          | C5  | <b>21.7</b> |             |             |             |             |             |
|          | C7  | 23.4        | <b>28.5</b> |             |             |             |             |
| Pn 3-glc | C3  | <i>-Glu</i> | <i>-Glu</i> | <i>-Glu</i> | <i>-Glu</i> |             |             |
|          | C4' | 22.8        | 30.1        | <b>32.7</b> |             |             |             |
|          | C5  | 23.9        | <b>26.7</b> |             |             |             |             |
|          | C7  | <b>22.3</b> |             |             |             |             |             |
| Pt       | C3  | 23.2        | 28.7        | 33.3        | <b>34.7</b> |             |             |
|          | C3' | 28.8        | 30.3        | <b>32.3</b> |             |             |             |
|          | C4' | 24.2        | 28.3        | 32.6        | 41.3        | <b>43.7</b> |             |
|          | C5  | <b>21.5</b> |             |             |             |             |             |
|          | C7  | 22.7        | <b>27.7</b> |             |             |             |             |
| Pt-3-glc | C3  | <i>-Glu</i> | <i>-Glu</i> | <i>-Glu</i> | <i>-Glu</i> | <i>-Glu</i> |             |
|          | C3' | 29.8        | 35.6        | 37.9        | <b>40.7</b> |             |             |
|          | C4' | <b>22.4</b> |             |             |             |             |             |
|          | C5  | 23.7        | <b>29.1</b> | <b>30.9</b> |             |             |             |
|          | C7  | 23.5        | <b>29.1</b> |             |             |             |             |

**Table S2.** Dipole momenta ( $\mu$ , in D) and their corresponding vector in 3D-dimensions, obtained for the aglycones and their glycosides in pentyl ethanoate (cation form) and water (neutral form).

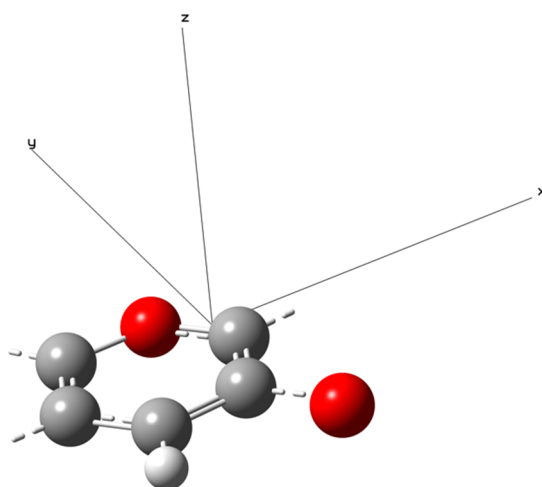

|          | pentyl ethanoate |                    | water     |                    |
|----------|------------------|--------------------|-----------|--------------------|
|          | +                |                    | 0         |                    |
|          | $\mu$ [D]        | vector (x,y,z)     | $\mu$ [D] | (x,y,z)            |
| Dp       | 10.2             | (-10.1, 0.3, 1.1)  | 22.5 (6)  | (-21.9, -5.3, 0)   |
| Dp 3-glc | 6.8              | (-0.0, 5.4, -4.1)  | 14.1 (2)  | (-11.7, 6.3, -4.9) |
| Pn       | 2.6              | (1.7, 1.7, 1.1)    | 15.5 (4)  | (-13.4, 7.7, 0.3)  |
| Pn-3-glc | 12.0             | (-11.6, -2.6, 1.9) | 11.2 (1)  | (-9.8, -4.8, -2.6) |
| Pt       | 4.7              | (-3.4, 3.2, -0.5)  | 15.3 (3)  | (11.3, 10.3, 0.8)  |
| Pt 3-glc | 10.6             | (7.6, 7.2, -2.0)   | 19.5 (5)  | (-7.5, 17.9, -1.9) |

**Table S3.** The reactivity of the studied anthocyanidins and their glycosides in SET and HAT mechanisms towards common radicals in water.

Delphinidin

*Neutral*

|                                |            |                              |            |
|--------------------------------|------------|------------------------------|------------|
| R-OH + OH* -> R-OH+* + OH-     | [ ]        | R-OH + OOH* -> R-OH+* + OOH- | [kcal/mol] |
| adiabatic                      | -9,2       | adiabatic                    | 14,2       |
| vertical                       | -5,1       | vertical                     | 27,5       |
| activation                     | 1,6        | activation                   | 14,2       |
| rate constants                 | 8.37E+9    | rate constants               | 2.36E+02   |
| R-OH + OH* -> R-O* + H2O       |            | R-OH + OOH* -> R-O* + H2O2   |            |
| <b>C3</b>                      | -45,4      | <b>C3</b>                    | -7,7       |
| <b>C3'</b>                     | -39,8      | <b>C3'</b>                   | -2,2       |
| <b>C5</b>                      | -41,1      | <b>C5</b>                    | -3,4       |
| <b>C5'</b>                     | -40,2      | <b>C5'</b>                   | -2,5       |
| <b>C7</b>                      | -41,5      | <b>C7</b>                    | -3,9       |
| R-OH + CH3O* -> R-OH+* + CH3O- | [kcal/mol] |                              |            |
| adiabatic                      | 10,8       |                              |            |
| vertical                       | 17,7       |                              |            |
| activation                     | 11,4       |                              |            |
| rate constants                 | 2,96E+04   |                              |            |
| R-OH + CH3O* -> R-O* + CH3OH   |            |                              |            |
| <b>C3</b>                      | -27,2      |                              |            |
| <b>C3'</b>                     | -21,6      |                              |            |
| <b>C5</b>                      | -22,9      |                              |            |
| <b>C5'</b>                     | -21,9      |                              |            |
| <b>C7</b>                      | -23,3      |                              |            |
| R-OH + SH* -> R-OH+* + SH-     | [kcal/mol] |                              |            |
| adiabatic                      | 6,4        |                              |            |
| vertical                       | 11,2       |                              |            |
| activation                     | 6,5        |                              |            |
| rate constants                 | 1,01E+08   |                              |            |
| R-OH + SH* -> R-O* + H2S       |            |                              |            |
| <b>C3</b>                      | -31,0      |                              |            |
| <b>C3'</b>                     | -25,4      |                              |            |
| <b>C5</b>                      | -26,7      |                              |            |
| <b>C5'</b>                     | -25,7      |                              |            |
| <b>C7</b>                      | -27,1      |                              |            |

# Anion

|                                                             |                                                         |
|-------------------------------------------------------------|---------------------------------------------------------|
| $R-OH + OH^* \rightarrow R-OH^{+*} + OH^-$ [kcal/mol]       | $R-OH + OOH^* \rightarrow R-OH^{+*} + OOH^-$ [kcal/mol] |
| <i>adiabatic</i> -23,1                                      | <i>adiabatic</i> 0,2                                    |
| <i>vertical</i> -17,1                                       | <i>vertical</i> 15,6                                    |
| <i>activation</i> 12,2                                      | <i>activation</i> 4,0                                   |
| <i>rate constants</i> 7,27E+03                              | <i>rate constants</i> 3.99E+09                          |
| $R-OH + OH^* \rightarrow R-O^* + H_2O$                      | $R-OH + OOH^* \rightarrow R-O^* + H_2O_2$               |
| <b>C3'</b> -43,9                                            | <b>C3'</b> -6,3                                         |
| <b>C5</b> -51,4                                             | <b>C5</b> -13,7                                         |
| <b>C5'</b> -45,4                                            | <b>C5'</b> -7,8                                         |
| <b>C7</b> -51,9                                             | <b>C7</b> -14,2                                         |
| $R-OH + CH_3O^* \rightarrow R-OH^{+*} + CH_3O^-$ [kcal/mol] |                                                         |
| <i>adiabatic</i> -3,1                                       |                                                         |
| <i>vertical</i> 5,7                                         |                                                         |
| <i>activation</i> 0,9                                       |                                                         |
| <i>rate constants</i> 7.85E+9                               |                                                         |
| $R-OH + CH_3O^* \rightarrow R-O^* + CH_3OH$                 |                                                         |
| <b>C3'</b> -25,7                                            |                                                         |
| <b>C5</b> -33,2                                             |                                                         |
| <b>C5'</b> -27,2                                            |                                                         |
| <b>C7</b> -33,7                                             |                                                         |
| $R-OH + SH^* \rightarrow R-OH^{+*} + SH^-$ [kcal/mol]       |                                                         |
| <i>adiabatic</i> -7,5                                       |                                                         |
| <i>vertical</i> -0,7                                        |                                                         |
| <i>activation</i> 0,0                                       |                                                         |
| <i>rate constants</i> 8.52E+9                               |                                                         |
| $R-OH + SH^* \rightarrow R-O^* + H_2S$                      |                                                         |
| <b>C3'</b> -29,5                                            |                                                         |
| <b>C5</b> -37,0                                             |                                                         |
| <b>C5'</b> -31,0                                            |                                                         |
| <b>C7</b> -37,5                                             |                                                         |

*Dianion*

|                                                                                                                                                                                                                                                                                   |                                                                                                                                                                                                                                                                           |
|-----------------------------------------------------------------------------------------------------------------------------------------------------------------------------------------------------------------------------------------------------------------------------------|---------------------------------------------------------------------------------------------------------------------------------------------------------------------------------------------------------------------------------------------------------------------------|
| $R-OH + OH^* \rightarrow R-OH^{+*} + OH^-$ [kcal/mol]<br><i>adiabatic</i> -31,6<br><i>vertical</i> -25,0<br><i>activation</i> 23,7<br><i>rate constants</i> 2,74E-05<br>$R-OH + OH^* \rightarrow R-O^* + H_2O$<br><b>C3'</b> -49,2<br><b>C5</b> -54,0<br><b>C5'</b> -48,7         | $R-OH + OOH^* \rightarrow R-OH^{+*} + OOH^-$ [kcal/mol]<br><i>adiabatic</i> -8,3<br><i>vertical</i> 7,7<br><i>activation</i> 0,9<br><i>rate constants</i> 8.03E+9<br>$R-OH + OOH^* \rightarrow R-O^* + H_2O_2$<br><b>C3'</b> -11,5<br><b>C5</b> -16,4<br><b>C5'</b> -11,0 |
| $R-OH + CH_3O^* \rightarrow R-OH^{+*} + CH_3O^-$ [kcal/mol]<br><i>adiabatic</i> -11,7<br><i>vertical</i> -2,2<br><i>activation</i> 0,1<br><i>rate constants</i> 7.92E+9<br>$R-OH + CH_3O^* \rightarrow R-O^* + CH_3OH$<br><b>C3'</b> -31,0<br><b>C5</b> -35,8<br><b>C5'</b> -30,5 |                                                                                                                                                                                                                                                                           |
| $R-OH + SH^* \rightarrow R-OH^{+*} + SH^-$ [kcal/mol]<br><i>adiabatic</i> -16,1<br><i>vertical</i> -8,6<br><i>activation</i> 2,5<br><i>rate constants</i> 7.84E+9<br>$R-OH + SH^* \rightarrow R-O^* + H_2S$<br><b>C3'</b> -34,8<br><b>C5</b> -39,6<br><b>C5'</b> -34,3            |                                                                                                                                                                                                                                                                           |

Trianion

|                                                             |          |                                                         |         |
|-------------------------------------------------------------|----------|---------------------------------------------------------|---------|
| $R-OH + OH^* \rightarrow R-OH^{+*} + OH^-$ [kcal/mol]       |          | $R-OH + OOH^* \rightarrow R-OH^{+*} + OOH^-$ [kcal/mol] |         |
| <i>adiabatic</i>                                            | -38,3    | <i>adiabatic</i>                                        | -15,0   |
| <i>vertical</i>                                             | -31,2    | <i>vertical</i>                                         | 1,5     |
| <i>activation</i>                                           | 34,8     | <i>activation</i>                                       | 0,0     |
| <i>rate constants</i>                                       | 2,03E-13 | <i>rate constants</i>                                   | 8.07E+9 |
| $R-OH + OH^* \rightarrow R-O^* + H_2O$                      |          | $R-OH + OOH^* \rightarrow R-O^* + H_2O_2$               |         |
| <b>C3'</b>                                                  | -53,3    | <b>C3'</b>                                              | -15,7   |
| <b>C5'</b>                                                  | -52,6    | <b>C5'</b>                                              | -15,0   |
| $R-OH + CH_3O^* \rightarrow R-OH^{+*} + CH_3O^-$ [kcal/mol] |          |                                                         |         |
| <i>adiabatic</i>                                            | -18,4    |                                                         |         |
| <i>vertical</i>                                             | -8,4     |                                                         |         |
| <i>activation</i>                                           | -0,7     |                                                         |         |
| <i>rate constants</i>                                       | 7.74E+9  |                                                         |         |
| $R-OH + CH_3O^* \rightarrow R-O^* + CH_3OH$                 |          |                                                         |         |
| <b>C3'</b>                                                  | -35,1    |                                                         |         |
| <b>C5'</b>                                                  | -34,4    |                                                         |         |
| $R-OH + SH^* \rightarrow R-OH^{+*} + SH^-$ [kcal/mol]       |          |                                                         |         |
| <i>adiabatic</i>                                            | -22,8    |                                                         |         |
| <i>vertical</i>                                             | -14,8    |                                                         |         |
| <i>activation</i>                                           | 6,9      |                                                         |         |
| <i>rate constants</i>                                       | 5,96E+07 |                                                         |         |
| $R-OH + SH^* \rightarrow R-O^* + H_2S$                      |          |                                                         |         |
| <b>C3'</b>                                                  | -38,9    |                                                         |         |
| <b>C5'</b>                                                  | -38,2    |                                                         |         |

# Delphinidin 3-O-glucoside

neutral

|                                                                                                                                                                                                                                                                                                       |                                                                                                                                                                                                                                                                                             |
|-------------------------------------------------------------------------------------------------------------------------------------------------------------------------------------------------------------------------------------------------------------------------------------------------------|---------------------------------------------------------------------------------------------------------------------------------------------------------------------------------------------------------------------------------------------------------------------------------------------|
| $R-OH + OH^* \rightarrow R-OH^{+*} + OH^-$ [kcal/mol]<br><i>adiabatic</i> -9,0<br><i>vertical</i> -4,9<br><i>activation</i> 1,5<br><i>rate constants</i> 8.93+09<br>$R-OH + OH^* \rightarrow R-O^* + H_2O$<br><b>C3'</b> -41,1<br><b>C5</b> -42,0<br><b>C5'</b> -41,9<br><b>C7</b> -40,7              | $R-OH + OOH^* \rightarrow R-OH^{+*} + OOH^-$ [kcal/mol]<br><i>adiabatic</i> 14,3<br><i>vertical</i> 27,8<br><i>activation</i> 14,3<br><i>rate constants</i> 2,00E+02<br>$R-OH + OOH^* \rightarrow R-O^* + H_2O_2$<br><b>C3'</b> -3,4<br><b>C5</b> -4,3<br><b>C5'</b> -4,2<br><b>C7</b> -3,0 |
| $R-OH + CH_3O^* \rightarrow R-OH^{+*} + CH_3O^-$ [kcal/mol]<br><i>adiabatic</i> 10,9<br><i>vertical</i> 17,9<br><i>activation</i> 11,4<br><i>rate constants</i> 2,54E+04<br>$R-OH + CH_3O^* \rightarrow R-O^* + CH_3OH$<br><b>C3'</b> -22,8<br><b>C5</b> -23,8<br><b>C5'</b> -23,7<br><b>C7</b> -22,4 |                                                                                                                                                                                                                                                                                             |
| $R-OH + SH^* \rightarrow R-OH^{+*} + SH^-$ [kcal/mol]<br><i>adiabatic</i> 6,6<br><i>vertical</i> 11,5<br><i>activation</i> 6,8<br><i>rate constants</i> 6.97+7<br>$R-OH + SH^* \rightarrow R-O^* + H_2S$<br><b>C3'</b> -26,6<br><b>C5</b> -27,6<br><b>C5'</b> -27,5<br><b>C7</b> -26,2                |                                                                                                                                                                                                                                                                                             |



# Anion

|                                                                                                                                                                                                                                                                                  |                                                                                                                                                                                                                                                                         |
|----------------------------------------------------------------------------------------------------------------------------------------------------------------------------------------------------------------------------------------------------------------------------------|-------------------------------------------------------------------------------------------------------------------------------------------------------------------------------------------------------------------------------------------------------------------------|
| $R-OH + OH^* \rightarrow R-OH^{+*} + OH^-$ [kcal/mol]<br><i>adiabatic</i> -16,5<br><i>vertical</i> -11,3<br><i>activation</i> 6,1<br><i>rate constants</i> 1,92E+08<br>$R-OH + OH^* \rightarrow R-O^* + H_2O$<br><b>C3'</b> -44,9<br><b>C5'</b> -44,5<br><b>C7</b> -41,0         | $R-OH + OOH^* \rightarrow R-OH^{+*} + OOH^-$ [kcal/mol]<br><i>adiabatic</i> 6,8<br><i>vertical</i> 21,4<br><i>activation</i> 7,8<br><i>rate constants</i> 1,11E+07<br>$R-OH + OOH^* \rightarrow R-O^* + H_2O_2$<br><b>C3'</b> -7,3<br><b>C5'</b> -6,8<br><b>C7</b> -3,3 |
| $R-OH + CH_3O^* \rightarrow R-OH^{+*} + CH_3O^-$ [kcal/mol]<br><i>adiabatic</i> 3,5<br><i>vertical</i> 11,5<br><i>activation</i> 4,1<br><i>rate constants</i> 3.42E+09<br>$R-OH + CH_3O^* \rightarrow R-O^* + CH_3OH$<br><b>C3'</b> -26,7<br><b>C5'</b> -26,3<br><b>C7</b> -22,8 |                                                                                                                                                                                                                                                                         |
| $R-OH + SH^* \rightarrow R-OH^{+*} + SH^-$ [kcal/mol]<br><i>adiabatic</i> -0,9<br><i>vertical</i> 5,1<br><i>activation</i> 1,08<br><i>rate constants</i> 9,01E+9<br>$R-OH + SH^* \rightarrow R-O^* + H_2S$<br><b>C3'</b> -30,5<br><b>C5'</b> -30,1<br><b>C7</b> -26,6            |                                                                                                                                                                                                                                                                         |

Dianion

|                                                                                                                                                                                                                                                               |                                                                                                                                                                                                                                                       |
|---------------------------------------------------------------------------------------------------------------------------------------------------------------------------------------------------------------------------------------------------------------|-------------------------------------------------------------------------------------------------------------------------------------------------------------------------------------------------------------------------------------------------------|
| $R-OH + OH^* \rightarrow R-OH^{+*} + OH^-$ [kcal/mol]<br><i>adiabatic</i> -22,1<br><i>vertical</i> -16,4<br><i>activation</i> 11,8<br><i>rate constants</i> 1,40E+04<br>$R-OH + OH^* \rightarrow R-O^* + H_2O$<br><b>C3'</b> -47,2<br><b>C5'</b> -47,0        | $R-OH + OOH^* \rightarrow R-OH^{+*} + OOH^-$ [kcal/mol]<br><i>adiabatic</i> 1,3<br><i>vertical</i> 16,2<br><i>activation</i> 4,4<br><i>rate constants</i> 2.75E+09<br>$R-OH + OOH^* \rightarrow R-O^* + H_2O_2$<br><b>C3'</b> -9,5<br><b>C5'</b> -9,3 |
| $R-OH + CH_3O^* \rightarrow R-OH^{+*} + CH_3O^-$ [kcal/mol]<br><i>adiabatic</i> -2,1<br><i>vertical</i> 6,4<br><i>activation</i> 1,20<br><i>rate constants</i> 8,22E+9<br>$R-OH + CH_3O^* \rightarrow R-O^* + CH_3OH$<br><b>C3'</b> -28,9<br><b>C5'</b> -28,7 |                                                                                                                                                                                                                                                       |
| $R-OH + SH^* \rightarrow R-OH^{+*} + SH^-$ [kcal/mol]<br><i>adiabatic</i> -6,5<br><i>vertical</i> -0,1<br><i>activation</i> 0,0<br><i>rate constants</i> 9.12E+9<br>$R-OH + SH^* \rightarrow R-O^* + H_2S$<br><b>C3'</b> -32,8<br><b>C5'</b> -32,5            |                                                                                                                                                                                                                                                       |

# Peonidin

## Cation

|                                                                                                                                                                                                                                                                                                      |                                                                                                                                                                                                                                                                                        |
|------------------------------------------------------------------------------------------------------------------------------------------------------------------------------------------------------------------------------------------------------------------------------------------------------|----------------------------------------------------------------------------------------------------------------------------------------------------------------------------------------------------------------------------------------------------------------------------------------|
| $R-OH + OH^* \rightarrow R-OH^{+*} + OH^-$ [kcal/mol]<br><i>adiabatic</i> 13,0<br><i>vertical</i> 17,5<br><i>activation</i> 17,0<br><i>rate constants</i> 2,09E+00<br>$R-OH + OH^* \rightarrow R-O^* + H_2O$<br><b>C3</b> -37,2<br><b>C4'</b> -35,0<br><b>C5</b> -33,3<br><b>C7</b> -28,5            | $R-OH + OOH^* \rightarrow R-OH^{+*} + OOH^-$ [kcal/mol]<br><i>adiabatic</i> 36,4<br><i>vertical</i> 50,2<br><i>activation</i> 45,7<br><i>rate constants</i> 2,12E-21<br>$R-OH + OOH^* \rightarrow R-O^* + H_2O_2$<br><b>C3</b> 0,5<br><b>C4'</b> 2,7<br><b>C5</b> 4,4<br><b>C7</b> 9,1 |
| $R-OH + CH_3O^* \rightarrow R-OH^{+*} + CH_3O^-$ [kcal/mol]<br><i>adiabatic</i> 33,0<br><i>vertical</i> 40,3<br><i>activation</i> 55,6<br><i>rate constants</i> 1,05E-28<br>$R-OH + CH_3O^* \rightarrow R-O^* + CH_3OH$<br><b>C3</b> -19,0<br><b>C4'</b> -16,8<br><b>C5</b> -15,0<br><b>C7</b> -10,3 |                                                                                                                                                                                                                                                                                        |
| $R-OH + SH^* \rightarrow R-OH^{+*} + SH^-$ [kcal/mol]<br><i>adiabatic</i> 28,6<br><i>vertical</i> 33,9<br><i>activation</i> 54,21<br><i>rate constants</i> 1,13E-27<br>$R-OH + SH^* \rightarrow R-O^* + H_2S$<br><b>C3</b> -22,8<br><b>C4'</b> -20,6<br><b>C5</b> -18,8<br><b>C7</b> -14,1           |                                                                                                                                                                                                                                                                                        |

## Neutral

|                                                                                                                                                                                                                                                                                   |                                                                                                                                                                                                                                                                        |
|-----------------------------------------------------------------------------------------------------------------------------------------------------------------------------------------------------------------------------------------------------------------------------------|------------------------------------------------------------------------------------------------------------------------------------------------------------------------------------------------------------------------------------------------------------------------|
| $R-OH + OH^* \rightarrow R-OH^{+*} + OH^-$ [kcal/mol]<br><i>adiabatic</i> -3,6<br><i>vertical</i> -0,7<br><i>activation</i> 0,0<br><i>rate constants</i> 8,48E+09<br>$R-OH + OH^* \rightarrow R-O^* + H_2O$<br><b>C3</b> -44,2<br><b>C4'</b> -37,2<br><b>C7</b> -32,5             | $R-OH + OOH^* \rightarrow R-OH^{+*} + OOH^-$ [kcal/mol]<br><i>adiabatic</i> 19,8<br><i>vertical</i> 32,0<br><i>activation</i> 21,0<br><i>rate constants</i> 2,57E-03<br>$R-OH + OOH^* \rightarrow R-O^* + H_2O_2$<br><b>C3</b> -6,6<br><b>C4'</b> 0,4<br><b>C7</b> 5,1 |
| $R-OH + CH_3O^* \rightarrow R-OH^{+*} + CH_3O^-$ [kcal/mol]<br><i>adiabatic</i> 16,4<br><i>vertical</i> 22,1<br><i>activation</i> 21,4<br><i>rate constants</i> 1,23E-03<br>$R-OH + CH_3O^* \rightarrow R-O^* + CH_3OH$<br><b>C3</b> -26,0<br><b>C4'</b> -19,0<br><b>C7</b> -14,3 |                                                                                                                                                                                                                                                                        |
| $R-OH + SH^* \rightarrow R-OH^{+*} + SH^-$ [kcal/mol]<br><i>adiabatic</i> 12,0<br><i>vertical</i> 15,7<br><i>activation</i> 16,65<br><i>rate constants</i> 3,84E+00<br>$R-OH + SH^* \rightarrow R-O^* + H_2S$<br><b>C3</b> -29,8<br><b>C4'</b> -22,8<br><b>C7</b> -18,1           |                                                                                                                                                                                                                                                                        |

# Anion

|                                                                                                                                                                                                                                                                   |                                                                                                                                                                                                                                                            |
|-------------------------------------------------------------------------------------------------------------------------------------------------------------------------------------------------------------------------------------------------------------------|------------------------------------------------------------------------------------------------------------------------------------------------------------------------------------------------------------------------------------------------------------|
| $R-OH + OH^* \rightarrow R-OH^{+*} + OH^-$ [kcal/mol]<br><i>adiabatic</i> -9,6<br><i>vertical</i> -7,0<br><i>activation</i> 4,7100<br><i>rate constants</i> 1,74E+09<br>$R-OH + OH^* \rightarrow R-O^* + H_2O$<br><b>C3</b> -48,7<br><b>C4'</b> -39,8             | $R-OH + OOH^* \rightarrow R-OH^{+*} + OOH^-$ [kcal/mol]<br><i>adiabatic</i> 13,7<br><i>vertical</i> 25,6<br><i>activation</i> 13,7700<br><i>rate constants</i> 5,01E+02<br>$R-OH + OOH^* \rightarrow R-O^* + H_2O_2$<br><b>C3</b> -11,1<br><b>C4'</b> -2,1 |
| $R-OH + CH_3O^* \rightarrow R-OH^{+*} + CH_3O^-$ [kcal/mol]<br><i>adiabatic</i> 10,3<br><i>vertical</i> 15,8<br><i>activation</i> 11,3500<br><i>rate constants</i> 2,98E+04<br>$R-OH + CH_3O^* \rightarrow R-O^* + CH_3OH$<br><b>C3</b> -30,5<br><b>C4'</b> -21,5 |                                                                                                                                                                                                                                                            |
| $R-OH + SH^* \rightarrow R-OH^{+*} + SH^-$ [kcal/mol]<br><i>adiabatic</i> 5,9<br><i>vertical</i> 9,3<br><i>activation</i> 6,4<br><i>rate constants</i> 1,35E+08<br>$R-OH + SH^* \rightarrow R-O^* + H_2S$<br><b>C3</b> -34,3<br><b>C4'</b> -25,3                  |                                                                                                                                                                                                                                                            |

## Dianion

|                                                                                                                                                                                                                                              |                                                                                                                                                                                                                                      |
|----------------------------------------------------------------------------------------------------------------------------------------------------------------------------------------------------------------------------------------------|--------------------------------------------------------------------------------------------------------------------------------------------------------------------------------------------------------------------------------------|
| $R-OH + OH^* \rightarrow R-OH^{+*} + OH^-$ [kcal/mol]<br><i>adiabatic</i> -30,0<br><i>vertical</i> -26,2<br><i>activation</i> 45,16<br><i>rate constants</i> 4,86E-21<br>$R-OH + OH^* \rightarrow R-O^* + H_2O$<br><b>C4'</b> -54,3          | $R-OH + OOH^* \rightarrow R-OH^{+*} + OOH^-$ [kcal/mol]<br><i>adiabatic</i> -6,7<br><i>vertical</i> 6,5<br><i>activation</i> 0,80<br><i>rate constants</i> 8.04E+09<br>$R-OH + OOH^* \rightarrow R-O^* + H_2O_2$<br><b>C4'</b> -16,6 |
| $R-OH + CH_3O^* \rightarrow R-OH^{+*} + CH_3O^-$ [kcal/mol]<br><i>adiabatic</i> -10,0<br><i>vertical</i> -3,4<br><i>activation</i> 0,44<br><i>rate constants</i> 7.91E+09<br>$R-OH + CH_3O^* \rightarrow R-O^* + CH_3OH$<br><b>C4'</b> -36,1 |                                                                                                                                                                                                                                      |
| $R-OH + SH^* \rightarrow R-OH^{+*} + SH^-$ [kcal/mol]<br><i>adiabatic</i> -14,4<br><i>vertical</i> -9,8<br><i>activation</i> 5,22<br><i>rate constants</i> 8.35E+08<br>$R-OH + SH^* \rightarrow R-O^* + H_2S$<br><b>C4'</b> -39,9            |                                                                                                                                                                                                                                      |

Peonidin 3-O-glucoside

Neutral

|                                                                                                                                                                                                                                                                   |                                                                                                                                                                                                                                                         |
|-------------------------------------------------------------------------------------------------------------------------------------------------------------------------------------------------------------------------------------------------------------------|---------------------------------------------------------------------------------------------------------------------------------------------------------------------------------------------------------------------------------------------------------|
| $R-OH + OH^* \rightarrow R-OH^{+*} + OH^-$<br>[kcal/mol]<br><i>adiabatic</i> -1,9<br><i>vertical</i> 2,9<br><i>activation</i> 0,4<br><i>rate constants</i> 9.09E+09<br>$R-OH + OH^* \rightarrow R-O^* + H_2O$<br><b>C4'</b> -37,6<br><b>C5</b> -31,5              | $R-OH + OOH^* \rightarrow R-OH^{+*} + OOH^-$<br>[kcal/mol]<br><i>adiabatic</i> 21,4<br><i>vertical</i> 35,6<br><i>activation</i> 22,3<br><i>rate constants</i> 2,73E-04<br>$R-OH + OOH^* \rightarrow R-O^* + H_2O_2$<br><b>C4'</b> 0,1<br><b>C5</b> 6,2 |
| $R-OH + CH_3O^* \rightarrow R-OH^{+*} + CH_3O^-$<br>[kcal/mol]<br><i>adiabatic</i> 18,1<br><i>vertical</i> 25,7<br><i>activation</i> 21,7<br><i>rate constants</i> 7,34E-04<br>$R-OH + CH_3O^* \rightarrow R-O^* + CH_3OH$<br><b>C4'</b> -19,3<br><b>C5</b> -13,3 |                                                                                                                                                                                                                                                         |
| $R-OH + SH^* \rightarrow R-OH^{+*} + SH^-$ [kcal/mol]<br><i>adiabatic</i> 13,7<br><i>vertical</i> 19,3<br><i>activation</i> 16,63<br><i>rate constants</i> 4,01E+00<br>$R-OH + SH^* \rightarrow R-O^* + H_2S$<br><b>C4'</b> -23,2<br><b>C5</b> -17,1              |                                                                                                                                                                                                                                                         |

# Anion

|                                                                                                                                                                                                                                                   |                                                                                                                                                                                                                                            |
|---------------------------------------------------------------------------------------------------------------------------------------------------------------------------------------------------------------------------------------------------|--------------------------------------------------------------------------------------------------------------------------------------------------------------------------------------------------------------------------------------------|
| $R-OH + OH^* \rightarrow R-OH^{+*} + OH^-$<br>[kcal/mol]<br><i>adiabatic</i> -9,8<br><i>vertical</i> -6,1<br><i>activation</i> 2,5100<br><i>rate constants</i> 8,25E+9<br>$R-OH + OH^* \rightarrow R-O^* + H_2O$<br><b>C4'</b> -39,6              | $R-OH + OOH^* \rightarrow R-OH^{+*} + OOH^-$<br>[kcal/mol]<br><i>adiabatic</i> 13,5<br><i>vertical</i> 26,6<br><i>activation</i> 13,5000<br><i>rate constants</i> 7,84E+02<br>$R-OH + OOH^* \rightarrow R-O^* + H_2O_2$<br><b>C4'</b> -1,9 |
| $R-OH + CH_3O^* \rightarrow R-OH^{+*} + CH_3O^-$<br>[kcal/mol]<br><i>adiabatic</i> 10,2<br><i>vertical</i> 16,7<br><i>activation</i> 10,7300<br><i>rate constants</i> 8,51E+04<br>$R-OH + CH_3O^* \rightarrow R-O^* + CH_3OH$<br><b>C4'</b> -21,4 |                                                                                                                                                                                                                                            |
| $R-OH + SH^* \rightarrow R-OH^{+*} + SH^-$ [kcal/mol]<br><i>adiabatic</i> 5,8<br><i>vertical</i> 10,3<br><i>activation</i> 5,89<br><i>rate constants</i> 2,87E+08<br>$R-OH + SH^* \rightarrow R-O^* + H_2S$<br><b>C4'</b> -25,2                   |                                                                                                                                                                                                                                            |



*Dianion*

|                                                                |                                                            |
|----------------------------------------------------------------|------------------------------------------------------------|
| $R-OH + OH^* \rightarrow R-OH^{+*} + OH^-$<br>[kcal/mol]       | $R-OH + OOH^* \rightarrow R-OH^{+*} + OOH^-$<br>[kcal/mol] |
| <i>adiabatic</i> -20,9                                         | <i>adiabatic</i> 2,4                                       |
| <i>vertical</i> -16,0                                          | <i>vertical</i> 16,7                                       |
| <i>activation</i> 13,0600                                      | <i>activation</i> 4,8800                                   |
| <i>rate constants</i> 1,65E+03                                 | <i>rate constants</i> 1,39E+09                             |
| $R-OH + CH_3O^* \rightarrow R-OH^{+*} + CH_3O^-$<br>[kcal/mol] |                                                            |
| <i>adiabatic</i> -0,9                                          |                                                            |
| <i>vertical</i> 6,8                                            |                                                            |
| <i>activation</i> 1,5000                                       |                                                            |
| <i>rate constants</i> 8.21E+9                                  |                                                            |
| $R-OH + SH^* \rightarrow R-OH^{+*} + SH^-$ [kcal/mol]          |                                                            |
| <i>adiabatic</i> -5,3                                          |                                                            |
| <i>vertical</i> 0,4                                            |                                                            |
| <i>activation</i> 0,0100                                       |                                                            |
| <i>rate constants</i> 9.08E+09                                 |                                                            |

Petunidin  
Neutral

|                                                                                                                                                                                                                                                                                                             |                                                                                                                                                                                                                                                                                                 |
|-------------------------------------------------------------------------------------------------------------------------------------------------------------------------------------------------------------------------------------------------------------------------------------------------------------|-------------------------------------------------------------------------------------------------------------------------------------------------------------------------------------------------------------------------------------------------------------------------------------------------|
| $R-OH + OH^* \rightarrow R-OH^{+*} + OH^-$<br>[kcal/mol]<br><i>adiabatic</i> -2,7<br><i>vertical</i> -0,1<br><i>activation</i> 0,0000<br><i>rate constants</i> 8.45E+09<br>$R-OH + OH^* \rightarrow R-O^* + H_2O$<br><b>C3</b> -44,0<br><b>C3'</b> -36,4<br><b>C4'</b> -38,7<br><b>C7</b> -32,6             | $R-OH + OOH^* \rightarrow R-OH^{+*} + OOH^-$<br>[kcal/mol]<br><i>adiabatic</i> 20,6<br><i>vertical</i> 32,5<br><i>activation</i> 22,1900<br><i>rate constants</i> 3,36E-04<br>$R-OH + OOH^* \rightarrow R-O^* + H_2O_2$<br><b>C3</b> -6,3<br><b>C3'</b> 1,2<br><b>C4'</b> -1,0<br><b>C7</b> 5,1 |
| $R-OH + CH_3O^* \rightarrow R-OH^{+*} + CH_3O^-$<br>[kcal/mol]<br><i>adiabatic</i> 17,3<br><i>vertical</i> 22,6<br><i>activation</i> 24,0900<br><i>rate constants</i> 1,35E-05<br>$R-OH + CH_3O^* \rightarrow R-O^* + CH_3OH$<br><b>C3</b> -25,7<br><b>C3'</b> -18,2<br><b>C4'</b> -20,4<br><b>C7</b> -14,4 |                                                                                                                                                                                                                                                                                                 |
| $R-OH + SH^* \rightarrow R-OH^{+*} + SH^-$<br>[kcal/mol]<br><i>adiabatic</i> 12,9<br><i>vertical</i> 16,2<br><i>activation</i> 19,88<br><i>rate constants</i> 1,65E-02<br>$R-OH + SH^* \rightarrow R-O^* + H_2S$<br><b>C3</b> -29,6<br><b>C3'</b> -22,0<br><b>C4'</b> -24,2<br><b>C7</b> -18,2              |                                                                                                                                                                                                                                                                                                 |

# Anion

|                                                                                                                                                                                                                                                                                          |                                                                                                                                                                                                                                                                                 |
|------------------------------------------------------------------------------------------------------------------------------------------------------------------------------------------------------------------------------------------------------------------------------------------|---------------------------------------------------------------------------------------------------------------------------------------------------------------------------------------------------------------------------------------------------------------------------------|
| $R-OH + OH^* \rightarrow R-OH^{+*} + OH^-$<br>[kcal/mol]<br><i>adiabatic</i> -8,9<br><i>vertical</i> -7,1<br><i>activation</i> 7,0000<br><i>rate constants</i> 4,58E+07<br>$R-OH + OH^* \rightarrow R-O^* + H_2O$<br><b>C3</b> -47,9<br><b>C3'</b> -37,5<br><b>C4'</b> -40,6             | $R-OH + OOH^* \rightarrow R-OH^{+*} + OOH^-$<br>[kcal/mol]<br><i>adiabatic</i> 14,4<br><i>vertical</i> 25,6<br><i>activation</i> 14,6300<br><i>rate constants</i> 1,17E+02<br>$R-OH + OOH^* \rightarrow R-O^* + H_2O_2$<br><b>C3</b> -10,3<br><b>C3'</b> 0,2<br><b>C4'</b> -2,9 |
| $R-OH + CH_3O^* \rightarrow R-OH^{+*} + CH_3O^-$<br>[kcal/mol]<br><i>adiabatic</i> 11,1<br><i>vertical</i> 15,7<br><i>activation</i> 13,4000<br><i>rate constants</i> 9,39E+02<br>$R-OH + CH_3O^* \rightarrow R-O^* + CH_3OH$<br><b>C3</b> -29,7<br><b>C3'</b> -19,2<br><b>C4'</b> -22,4 |                                                                                                                                                                                                                                                                                 |
| $R-OH + SH^* \rightarrow R-OH^{+*} + SH^-$<br>[kcal/mol]<br><i>adiabatic</i> 6,7<br><i>vertical</i> 9,3<br><i>activation</i> 8,32<br><i>rate constants</i> 4,97E+06<br>$R-OH + SH^* \rightarrow R-O^* + H_2S$<br><b>C3</b> -33,5<br><b>C3'</b> -23,0<br><b>C4'</b> -26,2                 |                                                                                                                                                                                                                                                                                 |

*Dianion*

|                                                                                                                                                                                                                                                                   |                                                                                                                                                                                                                                                              |
|-------------------------------------------------------------------------------------------------------------------------------------------------------------------------------------------------------------------------------------------------------------------|--------------------------------------------------------------------------------------------------------------------------------------------------------------------------------------------------------------------------------------------------------------|
| $R-OH + OH^* \rightarrow R-OH^{+*} + OH^-$<br>[kcal/mol]<br><i>adiabatic</i> -18,3<br><i>vertical</i> -13,4<br><i>activation</i> 9,1600<br><i>rate constants</i> 1,19E+06<br>$R-OH + OH^* \rightarrow R-O^* + H_2O$<br><b>C3</b> -49,3<br><b>C4'</b> -49,2        | $R-OH + OOH^* \rightarrow R-OH^{+*} + OOH^-$<br>[kcal/mol]<br><i>adiabatic</i> 5,0<br><i>vertical</i> 19,2<br><i>activation</i> 6,4900<br><i>rate constants</i> 1,09E+08<br>$R-OH + OOH^* \rightarrow R-O^* + H_2O_2$<br><b>C3</b> -11,6<br><b>C4'</b> -11,6 |
| $R-OH + CH_3O^* \rightarrow R-OH^{+*} + CH_3O^-$<br>[kcal/mol]<br><i>adiabatic</i> 1,7<br><i>vertical</i> 9,4<br><i>activation</i> 2,8700<br><i>rate constants</i> 4,90E+10<br>$R-OH + CH_3O^* \rightarrow R-O^* + CH_3OH$<br><b>C3</b> -31,1<br><b>C4'</b> -31,0 |                                                                                                                                                                                                                                                              |
| $R-OH + SH^* \rightarrow R-OH^{+*} + SH^-$<br>[kcal/mol]<br><i>adiabatic</i> -2,7<br><i>vertical</i> 2,9<br><i>activation</i> 0,38<br><i>rate constants</i> 8.44E+09<br>$R-OH + SH^* \rightarrow R-O^* + H_2S$<br><b>C3</b> -34,9<br><b>C4'</b> -34,8             |                                                                                                                                                                                                                                                              |

*Trianion*

|                                                                                                                                                                                                                                                   |                                                                                                                                                                                                                                           |
|---------------------------------------------------------------------------------------------------------------------------------------------------------------------------------------------------------------------------------------------------|-------------------------------------------------------------------------------------------------------------------------------------------------------------------------------------------------------------------------------------------|
| $R-OH + OH^* \rightarrow R-OH^{+*} + OH^-$<br>[kcal/mol]<br><i>adiabatic</i> -32,6<br><i>vertical</i> -27,8<br><i>activation</i> 40,2500<br><i>rate constants</i> 1,93E-17<br>$R-OH + OH^* \rightarrow R-O^* + H_2O$<br><b>C4'</b> -54,1          | $R-OH + OOH^* \rightarrow R-OH^{+*} + OOH^-$<br>[kcal/mol]<br><i>adiabatic</i> -9,3<br><i>vertical</i> 4,9<br><i>activation</i> 0,4200<br><i>rate constants</i> 8.04E+09<br>$R-OH + OOH^* \rightarrow R-O^* + H_2O_2$<br><b>C4'</b> -16,4 |
| $R-OH + CH_3O^* \rightarrow R-OH^{+*} + CH_3O^-$<br>[kcal/mol]<br><i>adiabatic</i> -12,6<br><i>vertical</i> -5,0<br><i>activation</i> 0,8200<br><i>rate constants</i> 7.81E+09<br>$R-OH + CH_3O^* \rightarrow R-O^* + CH_3OH$<br><b>C4'</b> -35,8 |                                                                                                                                                                                                                                           |
| $R-OH + SH^* \rightarrow R-OH^{+*} + SH^-$<br>[kcal/mol]<br><i>adiabatic</i> -17,0<br><i>vertical</i> -11,4<br><i>activation</i> 5,8<br><i>rate constants</i> 3,47E+08<br>$R-OH + SH^* \rightarrow R-O^* + H_2S$<br><b>C4'</b> -39,7              |                                                                                                                                                                                                                                           |

Petunidin 3-O-glucoside

Cation

|                                                                                                                                                                                                                                                                                                          |                                                                                                                                                                                                                                                                                             |
|----------------------------------------------------------------------------------------------------------------------------------------------------------------------------------------------------------------------------------------------------------------------------------------------------------|---------------------------------------------------------------------------------------------------------------------------------------------------------------------------------------------------------------------------------------------------------------------------------------------|
| $R-OH + OH^* \rightarrow R-OH^{+*} + OH^-$ [kcal/mol]<br><i>adiabatic</i> 10,8<br><i>vertical</i> 15,7<br><i>activation</i> 12,5800<br><i>rate constants</i> 3,75E+03<br>$R-OH + OH^* \rightarrow R-O^* + H_2O$<br><b>C3'</b> -34,9<br><b>C4'</b> -39,4<br><b>C5</b> -31,6<br><b>C7</b> -29,7            | $R-OH + OOH^* \rightarrow R-OH^{+*} + OOH^-$ [kcal/mol]<br><i>adiabatic</i> 34,1<br><i>vertical</i> 48,3<br><i>activation</i> 41,1900<br><i>rate constants</i> 3,95E-18<br>$R-OH + OOH^* \rightarrow R-O^* + H_2O_2$<br><b>C3'</b> 2,8<br><b>C4'</b> -1,7<br><b>C5</b> 6,0<br><b>C7</b> 7,9 |
| $R-OH + CH_3O^* \rightarrow R-OH^{+*} + CH_3O^-$ [kcal/mol]<br><i>adiabatic</i> 30,8<br><i>vertical</i> 38,5<br><i>activation</i> 48,1300<br><i>rate constants</i> 3,26E-23<br>$R-OH + CH_3O^* \rightarrow R-O^* + CH_3OH$<br><b>C3'</b> -16,6<br><b>C4'</b> -21,1<br><b>C5</b> -13,4<br><b>C7</b> -11,5 |                                                                                                                                                                                                                                                                                             |
| $R-OH + SH^* \rightarrow R-OH^{+*} + SH^-$ [kcal/mol]<br><i>adiabatic</i> 26,4<br><i>vertical</i> 32,0<br><i>activation</i> 45,7100<br><i>rate constants</i> 1,91E-21<br>$R-OH + SH^* \rightarrow R-O^* + H_2S$<br><b>C3'</b> -20,4<br><b>C4'</b> -25,0<br><b>C5</b> -17,2<br><b>C7</b> -15,3            |                                                                                                                                                                                                                                                                                             |

## Neutral

|                                                                                                                                                                                                                                                                                    |                                                                                                                                                                                                                                                                             |
|------------------------------------------------------------------------------------------------------------------------------------------------------------------------------------------------------------------------------------------------------------------------------------|-----------------------------------------------------------------------------------------------------------------------------------------------------------------------------------------------------------------------------------------------------------------------------|
| $R-OH + OH^* \rightarrow R-OH^{+*} + OH^-$ [kcal/mol]<br><i>adiabatic</i> -10,7<br><i>vertical</i> -5,8<br><i>activation</i> 1,7200<br><i>rate constants</i> 8.85E+09<br>$R-OH + OH^* \rightarrow R-O^* + H_2O$<br><b>C3'</b> -43,4<br><b>C5</b> -40,6<br><b>C7</b> -42,4          | $R-OH + OOH^* \rightarrow R-OH^{+*} + OOH^-$ [kcal/mol]<br><i>adiabatic</i> 12,6<br><i>vertical</i> 26,8<br><i>activation</i> 12,6500<br><i>rate constants</i> 3,34E+03<br>$R-OH + OOH^* \rightarrow R-O^* + H_2O_2$<br><b>C3'</b> -5,7<br><b>C5</b> -2,9<br><b>C7</b> -4,7 |
| $R-OH + CH_3O^* \rightarrow R-OH^{+*} + CH_3O^-$ [kcal/mol]<br><i>adiabatic</i> 9,2<br><i>vertical</i> 16,9<br><i>activation</i> 9,2700<br><i>rate constants</i> 9,89E+05<br>$R-OH + CH_3O^* \rightarrow R-O^* + CH_3OH$<br><b>C3'</b> -25,1<br><b>C5</b> -22,3<br><b>C7</b> -24,2 |                                                                                                                                                                                                                                                                             |
| $R-OH + SH^* \rightarrow R-OH^{+*} + SH^-$ [kcal/mol]<br><i>adiabatic</i> 4,8<br><i>vertical</i> 10,5<br><i>activation</i> 4,84<br><i>rate constants</i> 1,48E+09<br>$R-OH + SH^* \rightarrow R-O^* + H_2S$<br><b>C3'</b> -28,9<br><b>C5</b> -26,1<br><b>C7</b> -28,0              |                                                                                                                                                                                                                                                                             |

## MonoAnion

|                                                                                                                                                                                                                                                                |                                                                                                                                                                                                                                                          |
|----------------------------------------------------------------------------------------------------------------------------------------------------------------------------------------------------------------------------------------------------------------|----------------------------------------------------------------------------------------------------------------------------------------------------------------------------------------------------------------------------------------------------------|
| $R-OH + OH^* \rightarrow R-OH^{+*} + OH^-$ [kcal/mol]<br><i>adiabatic</i> -20,2<br><i>vertical</i> -14,8<br><i>activation</i> 10,1400<br><i>rate constants</i> 2,29E+05<br>$R-OH + OH^* \rightarrow R-O^* + H_2O$<br><b>C3'</b> -48,3<br><b>C5</b> -44,2       | $R-OH + OOH^* \rightarrow R-OH^{+*} + OOH^-$ [kcal/mol]<br><i>adiabatic</i> 3,1<br><i>vertical</i> 17,9<br><i>activation</i> 5,4100<br><i>rate constants</i> 6,23E+08<br>$R-OH + OOH^* \rightarrow R-O^* + H_2O_2$<br><b>C3'</b> -10,6<br><b>C5</b> -6,6 |
| $R-OH + CH_3O^* \rightarrow R-OH^{+*} + CH_3O^-$ [kcal/mol]<br><i>adiabatic</i> -0,2<br><i>vertical</i> 8,0<br><i>activation</i> 1,9500<br><i>rate constants</i> 7.97E+9<br>$R-OH + CH_3O^* \rightarrow R-O^* + CH_3OH$<br><b>C3'</b> -30,1<br><b>C5</b> -26,0 |                                                                                                                                                                                                                                                          |
| $R-OH + SH^* \rightarrow R-OH^{+*} + SH^-$ [kcal/mol]<br><i>adiabatic</i> -4,6<br><i>vertical</i> 1,6<br><i>activation</i> 0,1<br><i>rate constants</i> 9.07E+09<br>$R-OH + SH^* \rightarrow R-O^* + H_2S$<br><b>C3'</b> -33,9<br><b>C5</b> -29,8              |                                                                                                                                                                                                                                                          |



*Dianion*

|                                                                                                                                                                                                                                              |                                                                                                                                                                                                                                         |
|----------------------------------------------------------------------------------------------------------------------------------------------------------------------------------------------------------------------------------------------|-----------------------------------------------------------------------------------------------------------------------------------------------------------------------------------------------------------------------------------------|
| $R-OH + OH^* \rightarrow R-OH^{+*} + OH^-$ [kcal/mol]<br><i>adiabatic</i> -23,8<br><i>vertical</i> -17,2<br><i>activation</i> 11,2100<br><i>rate constants</i> 3,79E+04<br>$R-OH + OH^* \rightarrow R-O^* + H_2O$<br><b>C3'</b> -50,9        | $R-OH + OOH^* \rightarrow R-OH^{+*} + OOH^-$ [kcal/mol]<br><i>adiabatic</i> -0,5<br><i>vertical</i> 15,5<br><i>activation</i> 3,7500<br><i>rate constants</i> 4.81E+09<br>$R-OH + OOH^* \rightarrow R-O^* + H_2O_2$<br><b>C3'</b> -13,2 |
| $R-OH + CH_3O^* \rightarrow R-OH^{+*} + CH_3O^-$ [kcal/mol]<br><i>adiabatic</i> -3,8<br><i>vertical</i> 5,6<br><i>activation</i> 0,8300<br><i>rate constants</i> 8.21E+09<br>$R-OH + CH_3O^* \rightarrow R-O^* + CH_3OH$<br><b>C3'</b> -32,7 |                                                                                                                                                                                                                                         |
| $R-OH + SH^* \rightarrow R-OH^{+*} + SH^-$ [kcal/mol]<br><i>adiabatic</i> -8,2<br><i>vertical</i> -0,8<br><i>activation</i> 0,02<br><i>rate constants</i> 9.07E+09<br>$R-OH + SH^* \rightarrow R-O^* + H_2S$<br><b>C3'</b> -36,5             |                                                                                                                                                                                                                                         |
